# Supplementary material
Source: Springer Nature journal article supplement (https://www.springermedizin.de/resource/supplementary/12886_2013_549_MOESM1_ESM.pdf/9474096)

Identification

701 records were identified through database searching or other sources

99 duplicates

Screening

602 screened records

525 records were excluded

Eligibility

77 full-text articles were assessed for eligibility

44 full-text articles were excluded

07 papers found in the references of selected papers

Included

40 studies were included in the quantitative synthesis

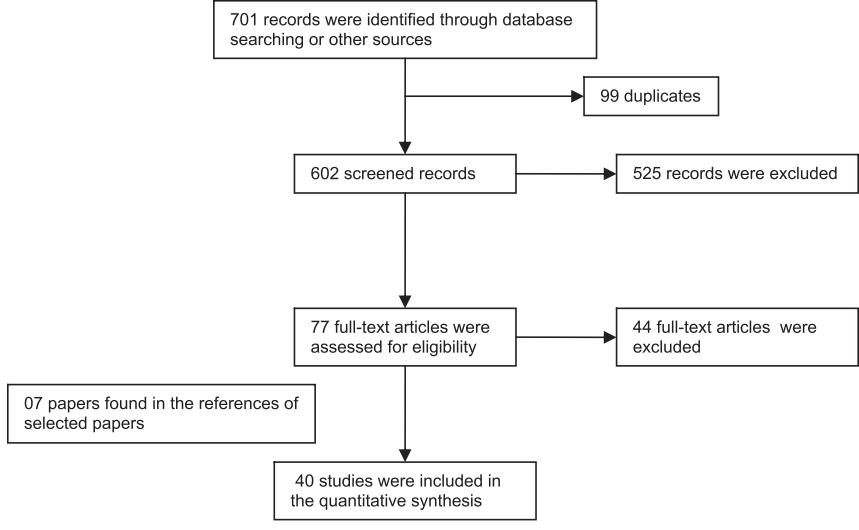

Supplement: MOESM1 [file 9474096]
